# Supplementary material for: The Role of Reviewer Characteristics on the Diversity of Successful Applicants
Source: Atypon-hosted journal article supplement (doi:10.1287/orsc.2023.17910), 2025-03-14
Supplement: orsc.2023.17910.sm1.pdf [file orsc.2023.17910.sm1.pdf]

Online Appendix:  
The Role of Reviewer Characteristics on the Diversity of  
Successful Applicants

Evelina Gavrilova-Zoutman\*

NHH Norwegian School of Economics

Steffen Juranek†

NHH Norwegian School of Economics

December 4, 2024

---

\*evelina.gavrilova@nhh.no

†steffen.juranek@nhh.no

## A Online Appendix

Table A.1: Variable definitions

| Variable                           | Definition                                                                                                                                                                                                                                                                                                                                                                         | Source                                             |
|------------------------------------|------------------------------------------------------------------------------------------------------------------------------------------------------------------------------------------------------------------------------------------------------------------------------------------------------------------------------------------------------------------------------------|----------------------------------------------------|
| <b>Female Inventor</b>             | Dummy variable equal to 1 if the applicant's first name is identified as female                                                                                                                                                                                                                                                                                                    | United States Social Security Administration (SSA) |
| <b>Examiner Female</b>             | Dummy variable equal to 1 if the examiner's first name is identified as female                                                                                                                                                                                                                                                                                                     | United States Social Security Administration (SSA) |
| <b>Examiner Experience</b>         | The filing year of an application minus the year of the first appearance of the examiner in the database                                                                                                                                                                                                                                                                           | USPTO examination dataset                          |
| <b>Examiner Workload</b>           | Number of active applications - new filings & filings form previous years without a final decision during the filing year of an application.                                                                                                                                                                                                                                       | USPTO examination dataset                          |
| <b>Assignee</b>                    | Dummy variable equal to 1 if the patent applications is assigned to an assignee                                                                                                                                                                                                                                                                                                    | PATSTAT                                            |
| <b>Small Entity</b>                | Dummy variable equal to 1 if the applicant has small entity status. Small entity status is granted to inventors without an assignee, and inventors that assign the ownership right to other individuals, to non-profit organizations or other entities with not more than than 500 employees, including affiliates. The small entity status implies a fee reduction by 50 percent. | USPTO examination dataset                          |
| <b>Family Size</b>                 | Number of patent offices at which a given application invention has been filed                                                                                                                                                                                                                                                                                                     | PATSTAT                                            |
| <b>No of indep claims</b>          | Number of independent claims stated in a patent. The claims described in the patent application define the legal boundaries of patent rights - more independent claims contribute to the breadth and depth of a patent.                                                                                                                                                            | USPTO patent claims dataset                        |
| <b>No of dep claims</b>            | Number of dependent claims stated in a patent. Dependent claims relate to an independent claim and limits its scope.                                                                                                                                                                                                                                                               | USPTO patent claims dataset                        |
| <b>Claims Ratio</b>                | Number of dependent claims per independent claim                                                                                                                                                                                                                                                                                                                                   | USPTO patent claims dataset                        |
| <b>Patent Scope</b>                | Number of 4-digit IPC classes assigned to the application                                                                                                                                                                                                                                                                                                                          | PATSTAT                                            |
| <b>Backward Citations</b>          | Number of US patents that are cited by the application                                                                                                                                                                                                                                                                                                                             | PATSTAT                                            |
| <b>Nr of Previous Applications</b> | Number of applications filed by the inventor before the filing date of an application                                                                                                                                                                                                                                                                                              | USPTO examination dataset                          |
| <b>Nr of Previous Grants</b>       | Number of granted patents to the inventor before the filing date of an application                                                                                                                                                                                                                                                                                                 | USPTO examination dataset                          |
| <b>Grade</b>                       | Grade scale of the examiner in the filing year of the application                                                                                                                                                                                                                                                                                                                  | Frakes and Wasserman (2017)                        |

Table A.2: Correlation matrix

|                       | Female<br>Inventor (FI) | Granted<br>Application | Examiner<br>Female | Examiner<br>Experience | Examiner<br>Workload | Assignee | Small<br>Entity | Family<br>Size | Independent<br>Claims | Dependent<br>Claims | Patent<br>Scope | Backward<br>Citations | Nr of Previous<br>Apps | Nr of Previous<br>Grants |
|-----------------------|-------------------------|------------------------|--------------------|------------------------|----------------------|----------|-----------------|----------------|-----------------------|---------------------|-----------------|-----------------------|------------------------|--------------------------|
| Female Inventor (FI)  | 1.000                   |                        |                    |                        |                      |          |                 |                |                       |                     |                 |                       |                        |                          |
| Granted Application   | -0.067                  | 1.000                  |                    |                        |                      |          |                 |                |                       |                     |                 |                       |                        |                          |
| Examiner Female       | 0.044                   | -0.051                 | 1.000              |                        |                      |          |                 |                |                       |                     |                 |                       |                        |                          |
| Examiner Experience   | 0.003                   | 0.127                  | -0.088             | 1.000                  |                      |          |                 |                |                       |                     |                 |                       |                        |                          |
| Examiner Workload     | -0.002                  | 0.154                  | -0.075             | 0.572                  | 1.000                |          |                 |                |                       |                     |                 |                       |                        |                          |
| Assignee              | -0.049                  | 0.351                  | -0.033             | 0.023                  | 0.001                | 1.000    |                 |                |                       |                     |                 |                       |                        |                          |
| Small Entity          | 0.067                   | -0.257                 | 0.050              | 0.046                  | 0.053                | -0.381   | 1.000           |                |                       |                     |                 |                       |                        |                          |
| Family Size           | -0.024                  | 0.115                  | 0.001              | 0.020                  | 0.025                | 0.065    | -0.143          | 1.000          |                       |                     |                 |                       |                        |                          |
| Independent Claims    | -0.006                  | 0.016                  | -0.003             | -0.057                 | -0.053               | 0.007    | -0.033          | 0.026          | 1.000                 |                     |                 |                       |                        |                          |
| Dependent Claims      | -0.015                  | 0.042                  | 0.011              | -0.043                 | -0.033               | 0.017    | 0.001           | 0.053          | 0.337                 | 1.000               |                 |                       |                        |                          |
| Patent Scope          | -0.013                  | 0.204                  | 0.007              | 0.007                  | 0.019                | 0.064    | -0.083          | 0.154          | 0.063                 | 0.061               | 1.000           |                       |                        |                          |
| Backward Citations    | -0.008                  | 0.025                  | -0.002             | -0.061                 | -0.025               | 0.009    | 0.030           | 0.057          | 0.082                 | 0.161               | 0.005           | 1.000                 |                        |                          |
| Nr of Previous Apps.  | -0.041                  | 0.071                  | -0.008             | 0.002                  | -0.011               | 0.104    | -0.169          | 0.035          | -0.010                | -0.029              | 0.025           | -0.017                | 1.000                  |                          |
| Nr of Previous Grants | -0.039                  | 0.087                  | -0.008             | 0.002                  | -0.007               | 0.105    | -0.173          | 0.034          | -0.011                | -0.027              | 0.028           | -0.017                | 0.984                  | 1.000                    |

**Note:** The table shows the pair-wise linear correlation coefficients for Each observation is a single-authored patent application.

Table A.3: Patent Application Characteristics by Gender and Granted Status

| Application Outcome   | (1)              | (2)              | (3)              | (4)              |
|-----------------------|------------------|------------------|------------------|------------------|
|                       | Not Granted      |                  | Granted          |                  |
| Applicant             | Male             | Female           | Male             | Female           |
| Assignee              | 0.450<br>(0.497) | 0.401<br>(0.490) | 0.790<br>(0.408) | 0.736<br>(0.441) |
| Small Entity          | 0.524<br>(0.499) | 0.648<br>(0.477) | 0.276<br>(0.447) | 0.348<br>(0.476) |
| Family Size           | 2.972<br>(4.141) | 2.510<br>(3.231) | 3.949<br>(4.372) | 3.822<br>(4.848) |
| Independent Claims    | 2.815<br>(2.380) | 2.726<br>(2.409) | 2.883<br>(2.231) | 2.883<br>(2.152) |
| Dependent Claims      | 15.13<br>(11.81) | 14.07<br>(11.43) | 16.13<br>(12.96) | 15.90<br>(11.37) |
| Claims Ratio          | 6.692<br>(5.424) | 6.394<br>(5.358) | 6.897<br>(5.150) | 6.905<br>(5.308) |
| Patent Scope          | 1.454<br>(0.822) | 1.446<br>(0.813) | 1.882<br>(1.112) | 1.896<br>(1.120) |
| Backward Citations    | 11.15<br>(14.50) | 10.82<br>(13.76) | 11.94<br>(16.01) | 11.40<br>(15.13) |
| Nr of Previous Apps.  | 11.00<br>(30.00) | 4.649<br>(36.78) | 15.94<br>(37.47) | 11.52<br>(65.23) |
| Nr of Previous Grants | 8.023<br>(22.66) | 3.271<br>(30.40) | 13.11<br>(31.49) | 9.602<br>(57.97) |
| Observations          | 208052           | 18547            | 325279           | 16657            |

*Notes:* Each observation is a single-authored patent application.

Table A.4: Patent Application and Examiner Characteristics by Technology Field

| Technology Field     | (1)              | (2)                       | (3)              | (4)                     | (5)              | (6)              | (7)              |
|----------------------|------------------|---------------------------|------------------|-------------------------|------------------|------------------|------------------|
|                      | Chemistry        | Computers & Communication | Drugs & Medical  | Electrical & Electronic | Mechanical       | Others           | Total            |
| Female Inventor (FI) | 0.060<br>(0.238) | 0.056<br>(0.230)          | 0.103<br>(0.305) | 0.040<br>(0.195)        | 0.034<br>(0.181) | 0.092<br>(0.289) | 0.062<br>(0.241) |
| Granted Application  | 0.576<br>(0.494) | 0.616<br>(0.486)          | 0.494<br>(0.500) | 0.718<br>(0.450)        | 0.672<br>(0.469) | 0.491<br>(0.500) | 0.601<br>(0.490) |
| Granted Female Apps. | 0.031<br>(0.174) | 0.032<br>(0.175)          | 0.041<br>(0.198) | 0.027<br>(0.161)        | 0.020<br>(0.140) | 0.031<br>(0.173) | 0.029<br>(0.169) |
| Examiner Female      | 0.293<br>(0.455) | 0.200<br>(0.400)          | 0.433<br>(0.495) | 0.229<br>(0.420)        | 0.196<br>(0.397) | 0.281<br>(0.449) | 0.251<br>(0.449) |
| Examiner Experience  | 10.95<br>(7.543) | 7.792<br>(5.847)          | 8.750<br>(6.125) | 9.138<br>(6.694)        | 10.44<br>(7.706) | 10.59<br>(7.461) | 9.431<br>(6.973) |
| Examiner Workload    | 2.661<br>(1.265) | 1.873<br>(1.098)          | 2.213<br>(1.147) | 2.452<br>(1.176)        | 2.672<br>(1.189) | 2.633<br>(1.252) | 2.370<br>(1.224) |
| Observations         | 43705            | 151588                    | 53525            | 94299                   | 102336           | 123082           | 568535           |

**Note:** Each observation is a single-authored patent application. The technology fields are defined according to the NBER definition (the most aggregate category level).

Table A.5: Gender Gap in Patenting with Estimates on Control Variables

|                       | (1)                        | (2)                  | (3)                  | (4)                  | (5)                  | (6)                  |
|-----------------------|----------------------------|----------------------|----------------------|----------------------|----------------------|----------------------|
|                       | Granted Patent Application |                      |                      |                      |                      |                      |
| Female Inventor (FI)  | -0.078***<br>(0.003)       | -0.066***<br>(0.003) | -0.065***<br>(0.003) | -0.036***<br>(0.003) | -0.040***<br>(0.004) | -0.055***<br>(0.004) |
| Assignee              |                            |                      |                      | 0.274***<br>(0.002)  | 0.261***<br>(0.003)  | 0.240***<br>(0.003)  |
| Small Entity          |                            |                      |                      | -0.073***<br>(0.002) | -0.080***<br>(0.003) | -0.103***<br>(0.003) |
| Family Size           |                            |                      |                      | 0.007***<br>(0.000)  | 0.010***<br>(0.001)  | 0.006***<br>(0.001)  |
| Nr of Previous Grants |                            |                      |                      | 0.000***<br>(0.000)  | 0.000***<br>(0.000)  | 0.001***<br>(0.000)  |
| Independent Claims    |                            |                      |                      | -0.001***<br>(0.000) | -0.001<br>(0.000)    | -0.001*<br>(0.001)   |
| Dependent Claims      |                            |                      |                      | 0.001***<br>(0.000)  | 0.002***<br>(0.000)  | 0.002***<br>(0.000)  |
| Patent Scope          |                            |                      |                      | 0.088***<br>(0.001)  | 0.089***<br>(0.002)  | 0.106***<br>(0.002)  |
| Backward Citations    |                            |                      |                      | 0.002***<br>(0.000)  | 0.002***<br>(0.000)  | 0.002***<br>(0.000)  |
| Observations          | 568535                     | 568535               | 568535               | 568535               | 256144               | 218547               |
| Art unit-Year FE      | x                          | x                    | x                    | x                    | x                    | x                    |
| Examiner FE           | -                          | x                    | -                    | -                    | -                    | -                    |
| Examiner-Year FE      | -                          | -                    | x                    | x                    | x                    | x                    |
| Sample                | Full                       | Full                 | Full                 | Full                 | Large Art Units      | US                   |

**Note:** The dependent variable is the dummy variable whether a patent was granted. Fixed Effects are noted at the bottom. All models include the following control variables: assignee, small entity, family size, number of patent grants obtained previously by the applicant, number of independent claims, number of dependent claims, patent scope, and backward citations. Robust standard errors clustered at the examiner level are reported in parenthesis. Asterisks denote: \*\*\* $p < 0.01$ , \*\* $p < 0.05$ , \* $p < 0.1$ .

Table A.6: The Single Inventor Case: Subsample Analysis

|                          | (1)                        | (2)                  | (3)                  | (4)                  | (5)                  | (6)                  | (7)                  |
|--------------------------|----------------------------|----------------------|----------------------|----------------------|----------------------|----------------------|----------------------|
|                          | Granted Patent Application |                      |                      |                      |                      |                      |                      |
| Female Inventor (FI)     | -0.028***<br>(0.006)       | -0.017**<br>(0.008)  | -0.030***<br>(0.009) | -0.028***<br>(0.010) | -0.015<br>(0.009)    | -0.043***<br>(0.010) | -0.031***<br>(0.010) |
| Examiner Female          | 0.000<br>(0.003)           | 0.002<br>(0.004)     | -0.002<br>(0.004)    | 0.001<br>(0.005)     | -0.001<br>(0.005)    | 0.001<br>(0.005)     | 0.000<br>(0.004)     |
| FI × Examiner Female     | -0.006<br>(0.006)          | -0.013<br>(0.008)    | 0.009<br>(0.009)     | -0.004<br>(0.010)    | -0.007<br>(0.010)    | -0.006<br>(0.011)    | -0.005<br>(0.010)    |
| Examiner Experience      | 0.004***<br>(0.000)        | 0.004***<br>(0.000)  | 0.004***<br>(0.000)  | 0.004***<br>(0.000)  | 0.004***<br>(0.000)  | 0.003***<br>(0.000)  | 0.004***<br>(0.000)  |
| FI × Examiner Experience | 0.001<br>(0.001)           | 0.000<br>(0.001)     | 0.000<br>(0.001)     | 0.001<br>(0.001)     | -0.000<br>(0.001)    | 0.001<br>(0.001)     | 0.000<br>(0.001)     |
| Examiner Workload        | 0.046***<br>(0.002)        | 0.051***<br>(0.002)  | 0.045***<br>(0.002)  | 0.045***<br>(0.002)  | 0.041***<br>(0.002)  | 0.047***<br>(0.002)  | 0.045***<br>(0.002)  |
| FI × Examiner Workload   | -0.009***<br>(0.003)       | -0.012***<br>(0.003) | -0.012***<br>(0.004) | -0.014***<br>(0.004) | -0.010***<br>(0.004) | -0.007<br>(0.004)    | -0.011***<br>(0.004) |
| Observations             | 568535                     | 315192               | 185790               | 215798               | 197955               | 257847               | 230622               |
| Art unit-Year FE         | x                          | x                    | x                    | x                    | x                    | x                    | x                    |
| Control Variables        | x                          | x                    | x                    | x                    | x                    | x                    | x                    |
| Sample                   | Full                       | P. Scope = 1         | Fam. Size = 1        | S. Entity            | No Assignee          | Large Art Units      | US                   |

**Note:** The dependent variable is the dummy variable whether a patent was granted. Fixed Effects are noted at the bottom. All models include the following control variables: assignee, small entity, family size, number of patent grants obtained previously by the applicant, number of independent claims, number of dependent claims, patent scope, and backward citations. Robust standard errors clustered at the examiner level are reported in parenthesis. Asterisks denote: \*\*\* $p < 0.01$ , \*\* $p < 0.05$ , \* $p < 0.1$ .

Table A.7: The Single Inventor Case: Across Tech Fields

|                |                          | Granted Patent Application |                              |                      |                            |                      |                      |
|----------------|--------------------------|----------------------------|------------------------------|----------------------|----------------------------|----------------------|----------------------|
|                |                          | Chemistry                  | Computers &<br>Communication | Drugs &<br>Health    | Electrical &<br>Electronic | Mechanical           | Others               |
| <b>Panel A</b> |                          |                            |                              |                      |                            |                      |                      |
|                | Female Inventor (FI)     | -0.035<br>(0.022)          | -0.017*<br>(0.010)           | -0.018<br>(0.017)    | -0.056***<br>(0.018)       | -0.058***<br>(0.021) | -0.043***<br>(0.013) |
|                | Examiner Female          | -0.018*<br>(0.010)         | 0.008*<br>(0.005)            | -0.021***<br>(0.007) | 0.016**<br>(0.007)         | 0.004<br>(0.009)     | 0.009<br>(0.008)     |
|                | FI × Examiner Female     | 0.009<br>(0.019)           | 0.018<br>(0.011)             | -0.003<br>(0.014)    | 0.024<br>(0.017)           | -0.004<br>(0.021)    | -0.006<br>(0.013)    |
|                | Examiner Experience      | 0.004***<br>(0.001)        | 0.004***<br>(0.001)          | 0.004***<br>(0.001)  | 0.004***<br>(0.001)        | 0.003***<br>(0.001)  | 0.004***<br>(0.001)  |
|                | FI × Examiner Experience | 0.000<br>(0.001)           | 0.001<br>(0.001)             | -0.001<br>(0.001)    | 0.001<br>(0.001)           | 0.000<br>(0.001)     | 0.001<br>(0.001)     |
|                | Examiner Workload        | 0.035***<br>(0.004)        | 0.063***<br>(0.004)          | 0.039***<br>(0.004)  | 0.043***<br>(0.003)        | 0.036***<br>(0.003)  | 0.044***<br>(0.004)  |
|                | FI × Examiner Workload   | -0.001<br>(0.009)          | -0.006<br>(0.005)            | -0.004<br>(0.006)    | 0.006<br>(0.007)           | 0.006<br>(0.007)     | -0.011**<br>(0.005)  |
|                | Observations             | 43338                      | 151285                       | 53355                | 93897                      | 101922               | 122763               |
|                | Art unit-Year FE         | x                          | x                            | x                    | x                          | x                    | x                    |
|                | Control Variables        | x                          | x                            | x                    | x                          | x                    | x                    |
|                |                          | Granted Patent Application |                              |                      |                            |                      |                      |
|                |                          | Chemistry                  | Computers &<br>Communication | Drugs &<br>Health    | Electrical &<br>Electronic | Mechanical           | Others               |
| <b>Panel B</b> |                          |                            |                              |                      |                            |                      |                      |
|                | Female Inventor (FI)     | -0.023<br>(0.024)          | -0.010<br>(0.011)            | -0.026<br>(0.018)    | -0.058***<br>(0.019)       | -0.052**<br>(0.022)  | -0.038***<br>(0.011) |
|                | FI × Examiner Female     | 0.011<br>(0.020)           | 0.020<br>(0.012)             | -0.000<br>(0.014)    | 0.034*<br>(0.018)          | -0.007<br>(0.023)    | 0.004<br>(0.010)     |
|                | FI × Examiner Experience | 0.001<br>(0.002)           | 0.001<br>(0.001)             | -0.001<br>(0.001)    | 0.001<br>(0.001)           | -0.000<br>(0.001)    | -0.001<br>(0.001)    |
|                | FI × Examiner Workload   | -0.008<br>(0.009)          | -0.006<br>(0.005)            | 0.004<br>(0.007)     | 0.004<br>(0.008)           | 0.008<br>(0.008)     | -0.005<br>(0.004)    |
|                | Observations             | 42195                      | 150490                       | 52844                | 93071                      | 101049               | 121944               |
|                | Art unit-Year FE         | x                          | x                            | x                    | x                          | x                    | x                    |
|                | Examiner-Year FE         | x                          | x                            | x                    | x                          | x                    | x                    |
|                | Control Variables        | x                          | x                            | x                    | x                          | x                    | x                    |

**Note:** The dependent variable is the dummy variable whether a patent was granted. Fixed Effects are noted at the bottom. All models include the following control variables: assignee, small entity, family size, number of patent grants obtained previously by the applicant, number of independent claims, number of dependent claims, patent scope, and backward citations. Robust standard errors clustered at the examiner level are reported in parenthesis. Asterisks denote: \*\*\* $p < 0.01$ , \*\* $p < 0.05$ , \* $p < 0.1$ .

Table A.8: The Single Inventor Case: Using the Female Likelihood.

|                                 | (1)                        | (2)                  | (3)                  | (4)                  | (5)                  |
|---------------------------------|----------------------------|----------------------|----------------------|----------------------|----------------------|
| <b>Panel A</b>                  | Granted Patent Application |                      |                      |                      |                      |
| Inventor Female Likelihood (IL) | -0.040***<br>(0.003)       | -0.039***<br>(0.003) | -0.042***<br>(0.004) | -0.032***<br>(0.005) | -0.031***<br>(0.005) |
| Examiner Female Likelihood (EL) |                            | -0.015***<br>(0.004) |                      |                      | 0.001<br>(0.003)     |
| IL × EL                         |                            | -0.003<br>(0.006)    |                      |                      | -0.007<br>(0.006)    |
| Examiner Experience             |                            |                      | 0.008***<br>(0.000)  |                      | 0.004***<br>(0.000)  |
| IL × Examiner Experience        |                            |                      | 0.000<br>(0.000)     |                      | 0.001<br>(0.000)     |
| Examiner Workload               |                            |                      |                      | 0.058***<br>(0.001)  | 0.046***<br>(0.001)  |
| IL × Examiner Workload          |                            |                      |                      | -0.003<br>(0.002)    | -0.005**<br>(0.002)  |
| Observations                    | 656480                     | 656480               | 656480               | 656480               | 656480               |
| Art unit-Year FE                | x                          | x                    | x                    | x                    | x                    |
| Control Variables               | x                          | x                    | x                    | x                    | x                    |
| <b>Panel B</b>                  | Granted Patent Application |                      |                      |                      |                      |
| Inventor Female Likelihood      | -0.033***<br>(0.002)       | -0.034***<br>(0.003) | -0.031***<br>(0.004) | -0.026***<br>(0.005) | -0.027***<br>(0.005) |
| IL × Examiner Female Likelihood |                            | 0.003<br>(0.005)     |                      |                      | 0.002<br>(0.005)     |
| IL × Examiner Experience        |                            |                      | -0.000<br>(0.000)    |                      | 0.000<br>(0.000)     |
| IL × Examiner Workload          |                            |                      |                      | -0.003<br>(0.002)    | -0.003<br>(0.002)    |
| Observations                    | 656480                     | 656480               | 656480               | 656480               | 656480               |
| Art unit-Year FE                | x                          | x                    | x                    | x                    | x                    |
| Examiner-Year FE                | x                          | x                    | x                    | x                    | x                    |
| Control Variables               | x                          | x                    | x                    | x                    | x                    |

**Note:** The dependent variable is the dummy variable whether a patent was granted. Fixed Effects are noted at the bottom. All models include the following control variables: assignee, small entity, family size, number of patent grants obtained previously by the applicant, number of independent claims, number of dependent claims, patent scope, and backward citations. Robust standard errors clustered at the examiner level are reported in parenthesis. Asterisks denote: \*\*\* $p < 0.01$ , \*\* $p < 0.05$ , \* $p < 0.1$ .

Table A.9: The Single Inventor Case: Different Cut-offs for the Gender Classification

|                          | 90%                        | 80%                  | 70%                  | 60%                  | 50%                  |
|--------------------------|----------------------------|----------------------|----------------------|----------------------|----------------------|
| <b>Panel A</b>           | Granted Patent Application |                      |                      |                      |                      |
| Female Inventor (FI)     | -0.028***<br>(0.006)       | -0.027***<br>(0.006) | -0.025***<br>(0.005) | -0.025***<br>(0.005) | -0.024***<br>(0.005) |
| Examiner Female          | 0.000<br>(0.003)           | 0.001<br>(0.003)     | 0.002<br>(0.003)     | 0.002<br>(0.003)     | 0.001<br>(0.003)     |
| FI × Examiner Female     | -0.006<br>(0.006)          | -0.005<br>(0.006)    | -0.007<br>(0.005)    | -0.007<br>(0.005)    | -0.009*<br>(0.005)   |
| Examiner Experience      | 0.004***<br>(0.000)        | 0.004***<br>(0.000)  | 0.004***<br>(0.000)  | 0.004***<br>(0.000)  | 0.004***<br>(0.000)  |
| FI × Examiner Experience | 0.001<br>(0.001)           | 0.001<br>(0.001)     | 0.001<br>(0.000)     | 0.001<br>(0.000)     | 0.000<br>(0.000)     |
| Examiner Workload        | 0.046***<br>(0.002)        | 0.046***<br>(0.002)  | 0.046***<br>(0.002)  | 0.046***<br>(0.001)  | 0.046***<br>(0.001)  |
| FI × Examiner Workload   | -0.009***<br>(0.003)       | -0.007***<br>(0.003) | -0.006***<br>(0.002) | -0.006**<br>(0.002)  | -0.005**<br>(0.002)  |
| Observations             | 568535                     | 597040               | 623008               | 639648               | 656480               |
| Art unit-Year FE         | x                          | x                    | x                    | x                    | x                    |
| Control Variables        | x                          | x                    | x                    | x                    | x                    |
| <b>Panel B</b>           | Granted Patent Application |                      |                      |                      |                      |
| Female Inventor (FI)     | -0.024***<br>(0.006)       | -0.025***<br>(0.006) | -0.023***<br>(0.005) | -0.022***<br>(0.005) | -0.021***<br>(0.005) |
| FI × Examiner Female     | 0.005<br>(0.006)           | 0.006<br>(0.005)     | 0.002<br>(0.005)     | 0.001<br>(0.005)     | -0.002<br>(0.005)    |
| FI × Examiner Experience | -0.000<br>(0.000)          | -0.000<br>(0.000)    | -0.000<br>(0.000)    | 0.000<br>(0.000)     | 0.000<br>(0.000)     |
| FI × Examiner Workload   | -0.005*<br>(0.002)         | -0.004<br>(0.002)    | -0.003<br>(0.002)    | -0.003<br>(0.002)    | -0.003<br>(0.002)    |
| Observations             | 568535                     | 596327               | 622629               | 639463               | 656480               |
| Art unit-Year FE         | x                          | x                    | x                    | x                    | x                    |
| Examiner-Year FE         | x                          | x                    | x                    | x                    | x                    |
| Control Variables        | x                          | x                    | x                    | x                    | x                    |

**Note:** The dependent variable is the dummy variable whether a patent was granted. Fixed Effects are noted at the bottom. All models include the following control variables: assignee, small entity application, family size, number of patent grants obtained previously by the applicant, number of independent claims, number of dependent claims, patent scope, and backward citations. Robust standard errors clustered at the examiner level are reported in parenthesis. Asterisks denote: \*\*\* $p < 0.01$ , \*\* $p < 0.05$ , \* $p < 0.1$ .

Table A.10: The Single Inventor Case: Logistic Regression

|                          | (1)                        | (2)                  | (3)                  | (4)                  | (5)                  |
|--------------------------|----------------------------|----------------------|----------------------|----------------------|----------------------|
|                          | Granted Patent Application |                      |                      |                      |                      |
| Female Inventor (FI)     | -0.194***<br>(0.015)       | -0.193***<br>(0.015) | -0.195***<br>(0.015) | -0.198***<br>(0.015) | -0.199***<br>(0.015) |
| Examiner Female          |                            | -0.075*<br>(0.039)   |                      |                      | 0.000<br>(0.036)     |
| FI × Examiner Female     |                            | 0.045<br>(0.037)     |                      |                      | 0.034<br>(0.036)     |
| Examiner Experience      |                            |                      | 0.037***<br>(0.002)  |                      | 0.017***<br>(0.003)  |
| FI × Examiner Experience |                            |                      | 0.000<br>(0.002)     |                      | 0.004<br>(0.003)     |
| Examiner Workload        |                            |                      |                      | 0.272***<br>(0.012)  | 0.213***<br>(0.015)  |
| FI × Examiner Workload   |                            |                      |                      | -0.026*<br>(0.016)   | -0.039**<br>(0.018)  |
| Observations             | 568535                     | 568535               | 568535               | 568535               | 568535               |
| Control Variables        | x                          | x                    | x                    | x                    | x                    |

**Note:** The table shows the coefficients of a logistic regression. All dependent variables are demeaned at the art unit-year level. All models include the following control variables: assignee, small entity, family size, number of patent grants obtained previously by the applicant, number of independent claims, number of dependent claims, patent scope, and backward citations. Robust standard errors clustered at the examiner level are reported in parenthesis. Asterisks denote: \*\*\* $p < 0.01$ , \*\* $p < 0.05$ , \* $p < 0.1$ .

Table A.11: The Single Inventor Case: Alternative Workload Measure

|                                     | (1)                        | (2)                  | (3)                  | (4)                  | (5)                  |
|-------------------------------------|----------------------------|----------------------|----------------------|----------------------|----------------------|
| <b>Panel A</b>                      |                            |                      |                      |                      |                      |
|                                     | Granted Patent Application |                      |                      |                      |                      |
| Female Inventor (FI)                | -0.043***<br>(0.003)       | -0.042***<br>(0.003) | -0.042***<br>(0.005) | -0.032***<br>(0.005) | -0.032***<br>(0.006) |
| Examiner Female                     |                            | -0.016***<br>(0.004) |                      |                      | -0.001<br>(0.003)    |
| FI × Female Examiner                |                            | -0.001<br>(0.007)    |                      |                      | -0.005<br>(0.006)    |
| Examiner Experience                 |                            |                      | 0.008***<br>(0.000)  |                      | 0.004***<br>(0.000)  |
| FI × Examiner Experience            |                            |                      | -0.000<br>(0.000)    |                      | 0.001<br>(0.001)     |
| Examiner Workload <sup>R</sup>      |                            |                      |                      | 0.065***<br>(0.001)  | 0.050***<br>(0.002)  |
| FI × Examiner Workload <sup>R</sup> |                            |                      |                      | -0.006**<br>(0.003)  | -0.008**<br>(0.003)  |
| Observations                        | 568535                     | 568535               | 568535               | 568535               | 568535               |
| Art unit-Year FE                    | x                          | x                    | x                    | x                    | x                    |
| Control Variables                   | x                          | x                    | x                    | x                    | x                    |
| <b>Panel B</b>                      |                            |                      |                      |                      |                      |
|                                     | Granted Patent Application |                      |                      |                      |                      |
| Female Inventor (FI)                | -0.036***<br>(0.003)       | -0.038***<br>(0.003) | -0.029***<br>(0.004) | -0.026***<br>(0.005) | -0.027***<br>(0.006) |
| FI × Female Examiner                |                            | 0.006<br>(0.006)     |                      |                      | 0.005<br>(0.006)     |
| FI × Examiner Experience            |                            |                      | -0.001*<br>(0.000)   |                      | -0.000<br>(0.000)    |
| FI × Examiner Workload <sup>R</sup> |                            |                      |                      | -0.005**<br>(0.002)  | -0.004<br>(0.003)    |
| Observations                        | 568535                     | 568535               | 568535               | 568535               | 568535               |
| Art unit-Year FE                    | x                          | x                    | x                    | x                    | x                    |
| Examiner-Year FE                    | x                          | x                    | x                    | x                    | x                    |
| Control Variables                   | x                          | x                    | x                    | x                    | x                    |

**Note:** The dependent variable is the dummy variable whether a patent was granted. *ExaminerWorkload<sup>R</sup>* denotes the alternative workload measure that only includes cases after the docketing date. Fixed Effects are noted at the bottom. All models include the following control variables: assignee, small entity, family size, number of patent grants obtained previously by the applicant, number of independent claims, number of dependent claims, patent scope, and backward citations. Robust standard errors clustered at the examiner level are reported in parenthesis. Asterisks denote: \*\*\* $p < 0.01$ , \*\* $p < 0.05$ , \* $p < 0.1$ .

Table A.12: Patent Application Characteristics: Single inventors versus Teams

|                       | (1)<br>Single    | (2)<br>Teams     |
|-----------------------|------------------|------------------|
| Granted Application   | 0.601<br>(0.490) | 0.665<br>(0.472) |
| Assignee              | 0.651<br>(0.477) | 0.748<br>(0.434) |
| Small Entity          | 0.381<br>(0.486) | 0.215<br>(0.411) |
| Family Size           | 3.541<br>(4.300) | 4.694<br>(10.89) |
| Independent Claims    | 2.853<br>(2.291) | 3.091<br>(2.724) |
| Dependent Claims      | 15.69<br>(12.47) | 18.61<br>(25.16) |
| Claims Ratio          | 6.806<br>(5.265) | 7.508<br>(5.703) |
| Patent Scope          | 1.711<br>(1.028) | 1.855<br>(1.137) |
| Backward Citations    | 11.60<br>(15.39) | 13.35<br>(18.51) |
| Nr of Previous Apps.  | 13.63<br>(36.19) | 12.73<br>(30.04) |
| Nr of Previous Grants | 10.82<br>(29.86) | 10.04<br>(23.37) |
| Observations          | 568535           | 573148           |

*Notes:* Each observation is a patent application. The number of previous applications and grants are calculated as averages across team members.

Table A.13: The team case: First Action Allowance Decision

|                          | (1)                    | (2)                  | (3)                  | (4)                  | (5)                  |
|--------------------------|------------------------|----------------------|----------------------|----------------------|----------------------|
| <b>Panel A</b>           |                        |                      |                      |                      |                      |
|                          | First action allowance |                      |                      |                      |                      |
| Female Share (FS)        | -0.009***<br>(0.001)   | -0.009***<br>(0.002) | 0.007***<br>(0.002)  | 0.012***<br>(0.002)  | 0.015***<br>(0.003)  |
| Examiner Female          |                        | -0.019***<br>(0.003) |                      |                      | -0.010***<br>(0.002) |
| FS × Examiner Female     |                        | 0.003<br>(0.003)     |                      |                      | -0.002<br>(0.003)    |
| Examiner Experience      |                        |                      | 0.005***<br>(0.000)  |                      | 0.004***<br>(0.000)  |
| FS × Examiner Experience |                        |                      | -0.002***<br>(0.000) |                      | -0.001***<br>(0.000) |
| Examiner Workload        |                        |                      |                      | 0.026***<br>(0.001)  | 0.013***<br>(0.001)  |
| FS × Examiner Workload   |                        |                      |                      | -0.009***<br>(0.001) | -0.005***<br>(0.001) |
| Number of inventors      | -0.002***<br>(0.000)   | -0.002***<br>(0.000) | -0.002***<br>(0.000) | -0.003***<br>(0.000) | -0.003***<br>(0.000) |
| Observations             | 1141678                | 1141678              | 1141678              | 1141678              | 1141678              |
| Art unit-Year FE         | x                      | x                    | x                    | x                    | x                    |
| Examiner FE              | -                      | -                    | -                    | -                    | -                    |
| Control Variables        | x                      | x                    | x                    | x                    | x                    |
| <b>Panel B</b>           |                        |                      |                      |                      |                      |
|                          | First action allowance |                      |                      |                      |                      |
| Female Share (FS)        | -0.038***<br>(0.002)   | -0.038***<br>(0.003) | -0.036***<br>(0.004) | -0.028***<br>(0.004) | -0.028***<br>(0.005) |
| FS × Examiner Female     |                        | -0.001<br>(0.004)    |                      |                      | -0.001<br>(0.004)    |
| FS × Examiner Experience |                        |                      | -0.000<br>(0.000)    |                      | 0.000<br>(0.000)     |
| FS × Examiner Workload   |                        |                      |                      | -0.004**<br>(0.002)  | -0.005***<br>(0.002) |
| Number of inventors      | 0.007***<br>(0.000)    | 0.007***<br>(0.000)  | 0.007***<br>(0.000)  | 0.007***<br>(0.000)  | 0.007***<br>(0.000)  |
| Observations             | 1141678                | 1141678              | 1141678              | 1141678              | 1141678              |
| Art unit-Year FE         | x                      | x                    | x                    | x                    | x                    |
| Examiner-Year FE         | x                      | x                    | x                    | x                    | x                    |
| Control Variables        | x                      | x                    | x                    | x                    | x                    |

**Note:** The dependent variable is the dummy variable whether a patent was granted by a first action on the merits, i.e., it did not receive a non-final rejection. Fixed Effects are noted at the bottom. All models include the following control variables: assignee, small entity, family size, the average number of patent grants obtained previously by the applicant, number of independent claims, number of dependent claims, patent scope, and backward citations. Robust standard errors clustered at the examiner level are reported in parenthesis. Asterisks denote: \*\*\* $p < 0.01$ , \*\* $p < 0.05$ , \* $p < 0.1$ .

Table A.14: The team case: Seniority - Including the examiners' grade scales in the analysis

|                          | (1)                        | (2)                  | (3)                  | (4)                  | (5)                  | (6)                  |
|--------------------------|----------------------------|----------------------|----------------------|----------------------|----------------------|----------------------|
|                          | Granted Patent Application |                      |                      |                      |                      |                      |
| Female Share (FS)        | -0.027***<br>(0.009)       | -0.015*<br>(0.008)   | -0.040***<br>(0.010) | -0.027***<br>(0.010) | -0.019<br>(0.012)    | -0.005<br>(0.012)    |
| Examiner Female          |                            |                      |                      |                      | -0.008**<br>(0.004)  |                      |
| FS × Examiner Female     | -0.010<br>(0.007)          | -0.001<br>(0.006)    |                      |                      | -0.010<br>(0.007)    | -0.001<br>(0.006)    |
| Examiner Experience      |                            |                      |                      |                      | 0.002***<br>(0.000)  |                      |
| FS × Examiner Experience | 0.001<br>(0.001)           | 0.000<br>(0.000)     |                      |                      | -0.000<br>(0.001)    | -0.001*<br>(0.001)   |
| Examiner Workload        |                            |                      |                      |                      | 0.038***<br>(0.003)  |                      |
| FS × Examiner Workload   | -0.010***<br>(0.003)       | -0.008***<br>(0.003) |                      |                      | -0.011***<br>(0.004) | -0.011***<br>(0.003) |
| GS-9                     |                            |                      | 0.028***<br>(0.004)  |                      | 0.010**<br>(0.004)   |                      |
| GS-11                    |                            |                      | 0.051***<br>(0.004)  |                      | 0.017***<br>(0.004)  |                      |
| GS-12                    |                            |                      | 0.074***<br>(0.004)  |                      | 0.026***<br>(0.005)  |                      |
| GS-13                    |                            |                      | 0.108***<br>(0.004)  |                      | 0.043***<br>(0.006)  |                      |
| GS-14                    |                            |                      | 0.154***<br>(0.004)  |                      | 0.056***<br>(0.007)  |                      |
| GS-15                    |                            |                      | 0.070***<br>(0.015)  |                      | -0.010<br>(0.014)    |                      |
| FS × GS-9                |                            |                      | -0.017<br>(0.013)    | -0.022*<br>(0.013)   | -0.014<br>(0.013)    | -0.018<br>(0.013)    |
| FS × GS-11               |                            |                      | 0.002<br>(0.013)     | -0.001<br>(0.013)    | 0.009<br>(0.013)     | 0.007<br>(0.013)     |
| FS × GS-12               |                            |                      | -0.007<br>(0.013)    | -0.012<br>(0.012)    | 0.003<br>(0.013)     | 0.001<br>(0.013)     |
| FS × GS-13               |                            |                      | -0.020<br>(0.012)    | -0.012<br>(0.012)    | -0.006<br>(0.014)    | 0.006<br>(0.013)     |
| FS × GS-14               |                            |                      | -0.007<br>(0.011)    | -0.013<br>(0.011)    | 0.017<br>(0.015)     | 0.020<br>(0.014)     |
| FS × GS-15               |                            |                      | 0.032<br>(0.021)     | 0.019<br>(0.017)     | 0.047**<br>(0.024)   | 0.047**<br>(0.020)   |
| Number of inventors      | 0.008***<br>(0.001)        | 0.007***<br>(0.001)  | 0.009***<br>(0.001)  | 0.007***<br>(0.001)  | 0.009***<br>(0.001)  | 0.007***<br>(0.001)  |
| Observations             | 699586                     | 699586               | 699586               | 699586               | 699586               | 699586               |
| Art unit-Year FE         | x                          | x                    | x                    | x                    | x                    | x                    |
| Examiner-Year FE         | -                          | x                    | -                    | x                    | -                    | x                    |
| Control Variables        | x                          | x                    | x                    | x                    | x                    | x                    |

**Note:** The dependent variable is the dummy variable whether a patent was granted. Fixed Effects are noted at the bottom. All models include the following control variables: assignee, small entity, family size, the average number of patent grants obtained previously by the applicant, number of independent claims, number of dependent claims, patent scope, and backward citations. Robust standard errors clustered at the examiner level are reported in parenthesis. Asterisks denote: \*\*\* $p < 0.01$ , \*\* $p < 0.05$ , \* $p < 0.1$ .

Figure A.1: The Marginal Effect of Reviewer Workload on Female Applicants

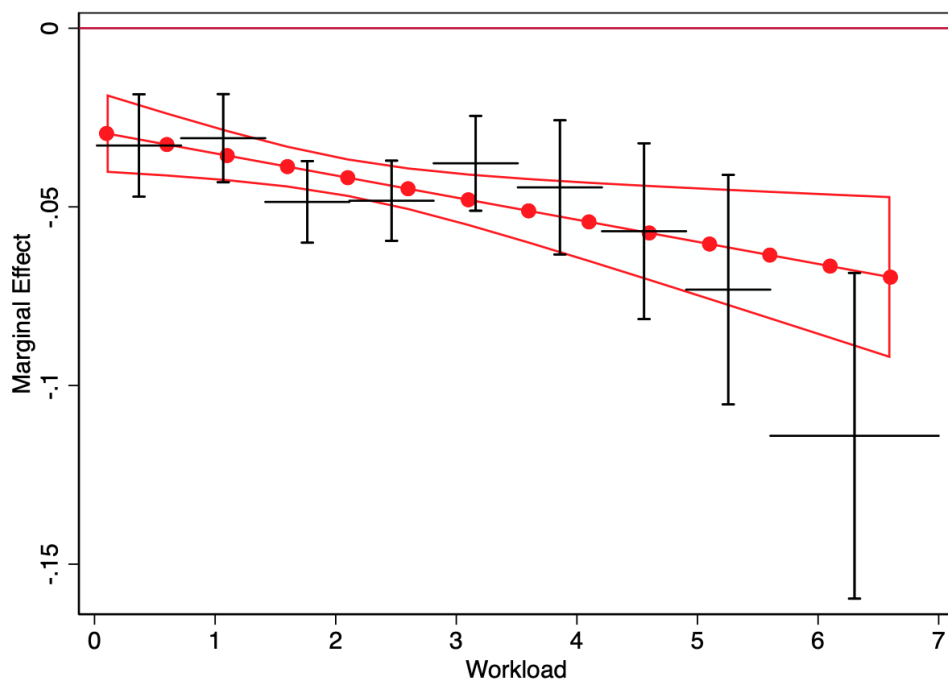

**Note:** This figure presents panel (a) of Figure 4a in red. The marginal effects show the effect of the workload on female applicants as compared to male applicants. The black horizontal lines represent the marginal effect for different workload spans encompassed by the ends of the horizontal lines. The workload has been divided into ten equal lengths within the range of the workload distribution. The highest two intervals are represented by one coefficient, as the right tail of the distribution is sparsely populated. The vertical lines present the 95% confidence interval for each estimated effect. The horizontal axis represents the workload of the examiner divided by 100.
